# Supplementary material for: Knowledge about HPV Infection and the HPV Vaccine among Parents in Southeastern Serbia
Source: MDPI journal article supplement (doi:10.3390/medicina58121697), 2022-11-22
Supplement: s1 [file s1]

## Supplement File S1

Anonymous questionnaire about knowledge about HPV infection and the HPV vaccine

### I Section

1. Sex males females
2. Age (in years)\_\_\_\_\_
3. Place of residence\_\_\_\_\_
4. Type of education: medical non-medical
5. Pediatrician recommendation Yes No

### II Section-Knowledge about HPV infection

6. How can you get infected with HPV?\_\_\_\_\_
7. What are the main ways of transmission?\_\_\_\_\_
8. Who is at higher risk of HPV infection?  
Men  
Women  
I don't know
9. Are the HPV infections and malignant disease connected?  
Yes  
No  
I don't know
10. Does HPV infection always lead to the clinical manifestation of the disease?  
Yes  
No  
I don't know
11. Do you know what is the Pap smear test ?  
Yes  
No  
I don't know
12. What factors increase the risk of developing cervical cancer?
13. How can HPV infection be prevented?  
By vaccine and by condom  
masks  
I don't know

### II Section- Knowledge about HPV vaccine

14. Is there a vaccine against HPV infection?  
Yes  
No  
I don't know
15. Is the HPV vaccine available in Serbia?  
Yes  
No  
I don't know
16. When is the best time to administrate the HPV vaccine?  
In children 9-14  
In children 15-19  
I don't know
17. Is the HPV safe?

Yes

No

I don t know

18. Are You worried about multiple doses of the HPV vaccine?

Yes

No

I don t know

19. What are the main side effects of HPV vaccine?

Yes

No

I don t know

20. Is there are a long life protection after HPV vaccination?

Yes

No

I don t know
